# Supplementary material
Source: PubMed Central journal article supplement (PMC3533494)
Supplement: NIHMS416925-supplement-1_si_001.pdf [file NIHMS416925-supplement-1_si_001.pdf]

## Supporting Information

# High-Performance Binary Protein Interaction Screening in a Microfluidic Format

*Matthias Meier<sup>1,2,3, ‡</sup>, Rene Sit<sup>1,2 ‡</sup>, Wenying Pan<sup>1,2, ‡</sup>, Stephen R. Quake<sup>1,2,\*</sup>*

<sup>1</sup>Department of Bioengineering, Stanford University, Stanford, CA, 94305, USA

<sup>2</sup>Howard Hughes Medical Institute, Stanford, CA, 94605, USA

<sup>3</sup>IMTEK - Department of Microsystems Engineering and BIOSS – Center for Signalling,  
University of Freiburg, 79100, Freiburg, Germany

## Material and Methods

### Primer Sequences for linear templates

#### S100A1 primer 5':

TTGTTTAACTTTAAGAAGGAGATATAACCATGATGGCAAGTATGACAGGGGGT  
CAACAAATGGGAATGGGCTCTGAGCTGG

#### S100A1 primer with c-Myc tag 3' (reverse complement):

GTAGCAGCCTGAGTCGTAAATCTTCCTCACTTATCAATTTTTGTTC CTTTCTTATAATGCCAACTTTGTAC

#### S100B primer 5':

TTGTTTAACTTTAAGAAGGAGATATAACCATGATGGCAAGTATGACAGGGGGTCAACAAATGGGAATGTCT  
GAGCTGGAGAAGG

#### S100B primer with c-Myc tag 3' (reverse complement):

GTAGCAGCCTGAGTCGTAAATCTTCCTCACTTATCAATTTTTGTTC GCAATGCTTTCTTATAATGCC

### Extension PCR specific for the in vitro expression system

#### Primer 5'

GATCTTAAGGCTAGAGTACTAATACGACTCACTATAGGGAGACCACAACGGTTCCCTCTAGAAATAATT  
TTGTTTAACTTTAAGAAGGAGATATAACC

#### Primer 3' (reverse complement):

CAAAAAACCCCTCAAGACCCGTTTAGAGGCCCAAGGGGTTATGCTAGTTTTTTTTTTTTTTTTTTTTTTTTT  
TTTTTTGTAGCAGCCTGAGTCG

### Primer Sequences for the p-SNAP fusion templates

#### SbfI S100A1 Serine Linker primer 5':

CAATAGCCTGCAGGTGGTAGCGGCAGCGGTAGCATGGGCTCTGAGCTGG

#### S100A1 His-Tag BamHI primer 3' (reverse complement):

GATAACGGATCCGTGATGGTGATGGTGATG CTTTCTTATAATGCCAACTTTGTAC

#### SbfI S100B Serine Linker primer 5':

CAATAGCCTGCAGGTGGTAGCGGCAGCGGTAGCATGTCTGAGCTGGAGAAGG

#### S100B His-Tag BamHI primer 3' (reverse complement):

GATAACGGATCCGTGATGGTGATGGTGATGGCAATGCTTTCTTATAATGCC

#### eGFP SbfI 5':

CAATAGCCTGCAGGTATGGTGAGCAAGGGCGA

#### eGFP His-Tag BamHI 3' (reverse complement):

GTAGCAGCCTGAGTCGTTATTAGTGATGGTGATGGTGATG

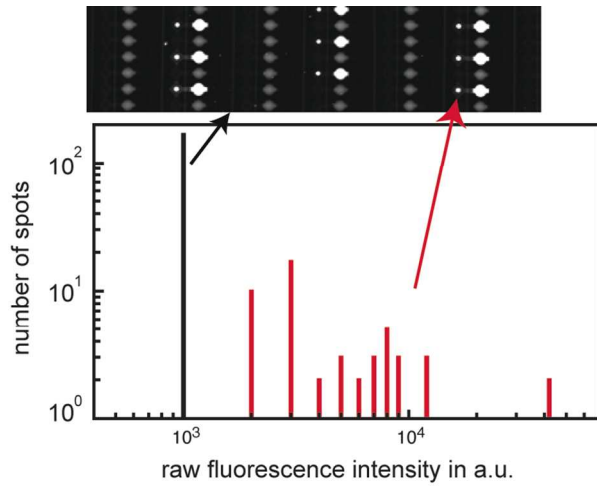

**Figure SI-1.** *In vitro* expression and pull-down of S-GFP-H on microfluidic chip with parallel micro-architecture. The histogram shows the raw fluorescence signal of S-GFP-H after pulled down on a surface with BSA-BG anchor in a ratio of 1:50. The red arrow points on the fluorescence image to a unit cell with expressed and pulled down GFP, were the black arrow points to a control chamber without GFP cDNA template.

| Step                                                                                    | Flush Time | Solution                                                           | Pictogram                                                                             |
|-----------------------------------------------------------------------------------------|------------|--------------------------------------------------------------------|---------------------------------------------------------------------------------------|
| Coating the glass surface with biotinylated BSA (Pierce,US)                             | 45 min     | 1 mg/ml in 0.5 M HEPES pH 7.2                                      | 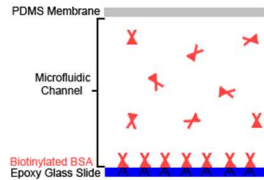   |
| Wash with Buffer                                                                        | 20 min     | 50 mM HEPES (pH 7.2), 1mg/ml BSA                                   |                                                                                       |
| Coat the surface with Neutravidin (Pierce, US)                                          | 45 min     | 0.5 mg/ml in 50 mM HEPES, pH 7.2                                   |    |
| Wash with Buffer                                                                        | 20 min     | see above                                                          |                                                                                       |
| Close 'button' membrane and passivate remaining surface area                            | 45 min     | biotinylated BSA 1mg/ml in 50 mM HEPES, pH 7.2                     |   |
| Wash with Buffer                                                                        | 20 min     | see above                                                          |                                                                                       |
| Lift 'button' membrane and introduce the pull-down Ab                                   | 45 min     | 1:100 dilution in 1 mg/ml BSA solution buffered in 50 mM HEPES 7.2 |  |
| Wash with Buffer                                                                        | 20 min     | See above                                                          |                                                                                       |
| Close 'button' membrane and add the E.coli cell extract to start the protein expression | 15 min     | TNT-T7 transcription S30 extract (Promega)                         |                                                                                       |
| Fill the expression chamber with E.coli and close them off. Incubate chip at 37°C       | 75 min     |                                                                    |                                                                                       |

|                                                                                                                                       |                |                 |  |
|---------------------------------------------------------------------------------------------------------------------------------------|----------------|-----------------|--|
| Separating each unit cell from each other and lift the 'Button' membrane. Allow equilibration of the unit cell by diffusion to occur. | 30 min         |                 |  |
| Separate the expression chambers and close the 'Button'. Reconnect the unit cells and wash device with Buffer                         | 5 min          |                 |  |
| Flush detection antibody in 50mM HEPES pH 7.2 with 1 mg/ml BSA                                                                        | 20 min.        | 1:1000 dilution |  |
| Separate unit cells from each other, lift the 'Button' membrane for equilibration of protein in the presence of antibody              | 20 min         |                 |  |
| Close the 'Button' valves. Reconnect the unit cells and wash the device with Buffer                                                   | 20 min         | see above       |  |
| <b>Total Runtime</b>                                                                                                                  | <b>425 min</b> |                 |  |

**Table-S1.** Flush steps during a PPI run on a first generation chip with IP chemical-architecture. The flow rate used during the runs was 0.5 uL per min. The devices were operated at 16 psi in the control channels and 5 psi for the flow lines. Green, red, yellow, and blue correspond to the four processes given in the main text.

| First Flow Circuit                                                                                                                     |            |                                               |           | Second Flow Circuit                         |            |                               |
|----------------------------------------------------------------------------------------------------------------------------------------|------------|-----------------------------------------------|-----------|---------------------------------------------|------------|-------------------------------|
| Step                                                                                                                                   | Flush Time | Solution                                      | Pictogram | Step                                        | Flush Time | Solution                      |
| Close 'button'. Coat the surrounding glass surface with BSA                                                                            | 20 min.    | 0.5 mg/ml in 50 mM HEPES, pH 7.2, 500 mM NaCl |           | Start in vitro expression of bait and prey. | 10 min     | E.coli S 30 Extract (Promega) |
| Coat the surface with BG-BSA                                                                                                           | 20 min.    | 0.5 mg/ml in 50 mM HEPES, pH 7.2              |           |                                             |            |                               |
| Wash                                                                                                                                   | 20 min.    | 50 mM HEPES, pH 7.2                           |           |                                             |            |                               |
| Separating each unit cell from each other and lift the 'Button' membrane. Allow diffusion of bait and prey over the pull down surface. | 30 min.    |                                               |           | Incubation<br>Incubate chip at 37°C         | 50 min     |                               |

|                                                                                                                                                                                             |                 |                                  |                                                                                                                                |  |
|---------------------------------------------------------------------------------------------------------------------------------------------------------------------------------------------|-----------------|----------------------------------|--------------------------------------------------------------------------------------------------------------------------------|--|
| Wash                                                                                                                                                                                        | 20 min.         | 50 mM HEPES, pH 7.2              |                                                                                                                                |  |
| Flush detection antibody in 50mM HEPES pH 7.2 with 1 mg/ml BSA and Separate unit cells from each other, lift the 'Button' membrane for equilibration of protein in the presence of antibody | 30 min          | 1:1000 dilution                  | <p>PDMS Membrane<br/>Microfluidic Channel<br/>BG-BSA<br/>BSA<br/>Epoxy Glass Slide<br/>Bait Protein<br/>Detection Antibody</p> |  |
| Wash with button down                                                                                                                                                                       | 10 min          | 50 mM HEPES, pH 7.2, 0.05% Tween | <p>PDMS Membrane<br/>Microfluidic Channel<br/>BG-BSA<br/>BSA<br/>Epoxy Glass Slide<br/>Bait Protein<br/>Detection Antibody</p> |  |
| <b>Total Time:</b>                                                                                                                                                                          | <b>150 min.</b> |                                  |                                                                                                                                |  |

**Table S2.** Flush steps during a PPI run on a chip with SNAP chemical-architecture. The flow rate used during the runs was 0.5  $\mu$ L per min. The devices were operated at 16 psi in the control channels and 5 psi for the flow lines. Green, red, yellow, and blue correspond to the four processes given in the main text.
